# Supplementary material for: Role of phosphorus in the seasonal deoxygenation of the East China Sea shelf
Source: Copernicus journal article supplement (doi:10.5194/bg-19-5893-2022), 2022-12-21
Supplement: Supplementary file 1 [file bg-19-5893-2022-supplement.pdf]

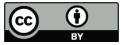

*Supplement of*

## **Role of phosphorus in the seasonal deoxygenation of the East China Sea shelf**

**Arnaud Laurent et al.**

*Correspondence to:* Arnaud Laurent (arnaud.laurent@dal.ca)

The copyright of individual parts of the supplement might differ from the article licence.

## TABLES

Table S1. Vertically integrated primary production, water column respiration, POM flux and SOC in zones 2, 4 and 5 along the CE-JI transect in July and August (15-31). The corresponding spatially resolved transects are available in Figure 6 and Figure S2.

Table S2. Area integrated annual change in O<sub>2</sub> sources and sinks.

Table S3. Summary of time-integrated hypoxic area ( $\times 10^3$  km<sup>2</sup> yr) in zone 2 for the baseline and nutrient reduction experiments.

Table S4. Summary of time-integrated hypoxic area ( $\times 10^3$  km<sup>2</sup> yr) in zone 3 for the baseline and nutrient reduction experiments.

Table S5. Area-specific annual change in O<sub>2</sub> sources and sinks (mmol O<sub>2</sub> m<sup>-2</sup>).

**Table S1.** Vertically integrated primary production, water column respiration, POM flux and SOC in zones 2, 4 and 5 along the CE-JI transect in July and August (15-31). The corresponding spatially resolved transects are available in Figure 6 and Figure S2.

|                                                                          |         | July 15-31 |        |        | August 15-31 |        |        |
|--------------------------------------------------------------------------|---------|------------|--------|--------|--------------|--------|--------|
|                                                                          |         | Zone 2     | Zone 4 | Zone 5 | Zone 2       | Zone 4 | Zone 5 |
| P. Production<br>(mmol O <sub>2</sub> m <sup>-2</sup> d <sup>-1</sup> )  | Average | 166.9      | 120.6  | 57.8   | 152.3        | 99.5   | 57.5   |
|                                                                          | ΔPP     | -19.7      | -45.1  | +15.7  | -25.0        | -3.1   | +17.0  |
| W. Respiration<br>(mmol O <sub>2</sub> m <sup>-2</sup> d <sup>-1</sup> ) | Average | 31.9       | 54.8   | 39.3   | 42.0         | 54.0   | 44.9   |
|                                                                          | ΔWR     | -0.2       | -0.2   | +5.2   | -0.2         | +4.9   | +9.9   |
| POM flux<br>(mmol N m <sup>-2</sup> d <sup>-1</sup> )                    | Average | 8.8        | 8.6    | 3.0    | 8.8          | 5.7    | 3.2    |
|                                                                          | ΔFPOM   | -1.4       | -4.6   | +0.6   | -2.4         | -1.9   | +1.1   |
| SOC<br>(mmol O <sub>2</sub> m <sup>-2</sup> d <sup>-1</sup> )            | Average | 69.0       | 63.7   | 18.9   | 69.4         | 44.2   | 23.9   |
|                                                                          | ΔSOC    | -10.1      | -32.9  | +3.1   | -18.2        | -13.5  | +7.9   |

**Table S2.** Area integrated annual change in O2 sources and sinks.

|                                   | Zone 1 | Zone 2 | Zone 3 | Zone 4 | Zone 5 | Zone 6 | Total  |
|-----------------------------------|--------|--------|--------|--------|--------|--------|--------|
| PP ( $10^8$ mol O <sub>2</sub> )  | 2.6    | -545.9 | -103.6 | -197.1 | 683.5  | 126.4  | -34.0  |
| WR ( $10^8$ mol O <sub>2</sub> )  | 3.0    | -20.8  | -8.9   | 188.2  | 329.4  | 67.2   | 558.0  |
| SOC ( $10^8$ mol O <sub>2</sub> ) | -18.2  | -270.7 | -61.2  | -552.6 | 202.3  | -21.2  | -721.6 |
| denitrification ( $10^9$ mol N)   | -1.9   | -28.2  | -6.4   | -57.7  | 21.1   | -2.2   | -75.3  |
| Denitrification (%)               | -1.9   | -12.6  | -5.2   | -14.0  | 17.7   | -0.9   | -6.2   |

**Table S3.** Summary of time-integrated hypoxic area ( $\times 10^3 \text{ km}^2 \text{ yr}$ ) in zone 2 for the baseline and nutrient reduction experiments.

|        |                     | Time-integrated hypoxic area in zone 2 ( $\times 10^3 \text{ km}^2 \text{ yr}$ ) |           |           |           |           |          |
|--------|---------------------|----------------------------------------------------------------------------------|-----------|-----------|-----------|-----------|----------|
|        |                     | Baseline                                                                         | 80%       | 60%       | 40%       | 20%       | 0%       |
| N+P    | 2008                | 197                                                                              | 135       | 60        | 8         | 0         | 0        |
|        | 2009                | 301                                                                              | 169       | 77        | 5         | 0         | 0        |
|        | 2010                | 714                                                                              | 474       | 227       | 69        | 0         | 0        |
|        | 2011                | 43                                                                               | 12        | 1         | 0         | 0         | 0        |
|        | 2012                | 242                                                                              | 111       | 22        | 0         | 0         | 0        |
|        | 2013                | 26                                                                               | 6         | 1         | 0         | 0         | 0        |
|        | $\Delta\bar{H}$ (%) | <b>100</b>                                                                       | <b>60</b> | <b>25</b> | <b>5</b>  | <b>0</b>  | <b>0</b> |
| N-only | 2008                | 197                                                                              | 160       | 122       | 65        | 1         | 0        |
|        | 2009                | 301                                                                              | 214       | 148       | 74        | 0         | 0        |
|        | 2010                | 714                                                                              | 576       | 399       | 136       | 0         | 0        |
|        | 2011                | 43                                                                               | 16        | 4         | 0         | 0         | 0        |
|        | 2012                | 242                                                                              | 150       | 68        | 6         | 0         | 0        |
|        | 2013                | 26                                                                               | 10        | 3         | 1         | 0         | 0        |
|        | $\Delta\bar{H}$ (%) | <b>100</b>                                                                       | <b>74</b> | <b>49</b> | <b>19</b> | <b>0</b>  | <b>0</b> |
| P-only | 2008                | 197                                                                              | 168       | 136       | 88        | 32        | 3        |
|        | 2009                | 301                                                                              | 234       | 172       | 114       | 49        | 3        |
|        | 2010                | 714                                                                              | 585       | 454       | 307       | 188       | 87       |
|        | 2011                | 43                                                                               | 31        | 20        | 10        | 4         | 0        |
|        | 2012                | 242                                                                              | 182       | 120       | 62        | 16        | 1        |
|        | 2013                | 26                                                                               | 16        | 9         | 5         | 2         | 1        |
|        | $\Delta\bar{H}$ (%) | <b>100</b>                                                                       | <b>80</b> | <b>60</b> | <b>38</b> | <b>19</b> | <b>6</b> |

**Table S4.** Summary of time-integrated hypoxic area ( $\times 10^3 \text{ km}^2 \text{ yr}$ ) in zone 3 for the baseline and nutrient reduction experiments.

|        |                      | Time-integrated hypoxic area in zone 3 ( $\times 10^3 \text{ km}^2 \text{ yr}$ ) |           |           |           |           |           |
|--------|----------------------|----------------------------------------------------------------------------------|-----------|-----------|-----------|-----------|-----------|
|        |                      | Baseline                                                                         | 80%       | 60%       | 40%       | 20%       | 0%        |
| N+P    | 2008                 | 323                                                                              | 228       | 127       | 50        | 1         | 0         |
|        | 2009                 | 351                                                                              | 236       | 154       | 71        | 1         | 0         |
|        | 2010                 | 461                                                                              | 332       | 174       | 48        | 0         | 0         |
|        | 2011                 | 25                                                                               | 12        | 4         | 0         | 0         | 0         |
|        | 2012                 | 116                                                                              | 68        | 32        | 6         | 0         | 0         |
|        | 2013                 | 34                                                                               | 20        | 9         | 1         | 0         | 0         |
|        | $\Delta \bar{H}$ (%) | <b>100</b>                                                                       | <b>68</b> | <b>38</b> | <b>14</b> | <b>0</b>  | <b>0</b>  |
| N-only | 2008                 | 323                                                                              | 256       | 160       | 64        | 0         | 0         |
|        | 2009                 | 351                                                                              | 270       | 185       | 87        | 0         | 0         |
|        | 2010                 | 461                                                                              | 363       | 228       | 67        | 0         | 0         |
|        | 2011                 | 25                                                                               | 13        | 4         | 0         | 0         | 0         |
|        | 2012                 | 116                                                                              | 75        | 39        | 10        | 0         | 0         |
|        | 2013                 | 34                                                                               | 23        | 13        | 4         | 0         | 0         |
|        | $\Delta \bar{H}$ (%) | <b>100</b>                                                                       | <b>76</b> | <b>48</b> | <b>18</b> | <b>0</b>  | <b>0</b>  |
| P-only | 2008                 | 323                                                                              | 293       | 250       | 198       | 143       | 82        |
|        | 2009                 | 351                                                                              | 300       | 248       | 203       | 157       | 111       |
|        | 2010                 | 461                                                                              | 425       | 383       | 331       | 268       | 200       |
|        | 2011                 | 25                                                                               | 22        | 18        | 14        | 10        | 7         |
|        | 2012                 | 116                                                                              | 100       | 85        | 69        | 54        | 36        |
|        | 2013                 | 34                                                                               | 29        | 24        | 19        | 13        | 6         |
|        | $\Delta \bar{H}$ (%) | <b>100</b>                                                                       | <b>89</b> | <b>77</b> | <b>64</b> | <b>49</b> | <b>34</b> |

**Table S5.** Area-specific annual change in O<sub>2</sub> sources and sinks (mmol O<sub>2</sub> m<sup>-2</sup>).

|     | Zone 1 | Zone 2 | Zone 3 | Zone 4 | Zone 5 | Zone 6 |
|-----|--------|--------|--------|--------|--------|--------|
| PP  | +10    | -3010  | -810   | -330   | +1310  | +170   |
| WR  | +10    | -110   | -70    | +310   | +630   | +90    |
| SOC | -80    | -1490  | -480   | -920   | +390   | -30    |

## FIGURES

Figure S1. Comparison of simulated surface  $\text{NO}_3$  (colored maps) with the 2010-2012 observations of Gao et al. (2015) and the 2013 observations of Ge et al. (2020) (2013) for the dates indicated in each panel (colored dots). Simulated  $\text{NO}_3$  corresponds to the average conditions during the cruise.

Figure S2. Mean change in POM flux and SOC due to P limitation (baseline – NoPlim) along the CE-JI transect line (see Figure 1) for July 15-31 (left) and August 15-31 (right).

Figure S3. Duration of P limitation in the surface waters of zones 1-6 (upper left) and change in primary production (upper right) water column respiration (lower left) and sediment  $\text{O}_2$  consumption (lower right). Data are averages for 2008-2013.

Figure S4. Effect of nutrient reduction on the size of the hypoxic area (time integrated) for zones 1-6 combined (left), zone 2 (middle) and zone 3 (right). The results presented are an average for 2011-2013.

Figure S5. Change in the relative importance of water column versus total respiration (2008-2013 monthly mean) due to P limitation (baseline - NoPlim).

Figure S6. Spatial distribution of stratification in summer (July-August, 2008-2013 averaged) in the ECS. The Potential Energy Anomaly (a proxy for stratification) is divided by water column depth to enable the comparison of areas with various depths (see Große et al. (2020) for details).



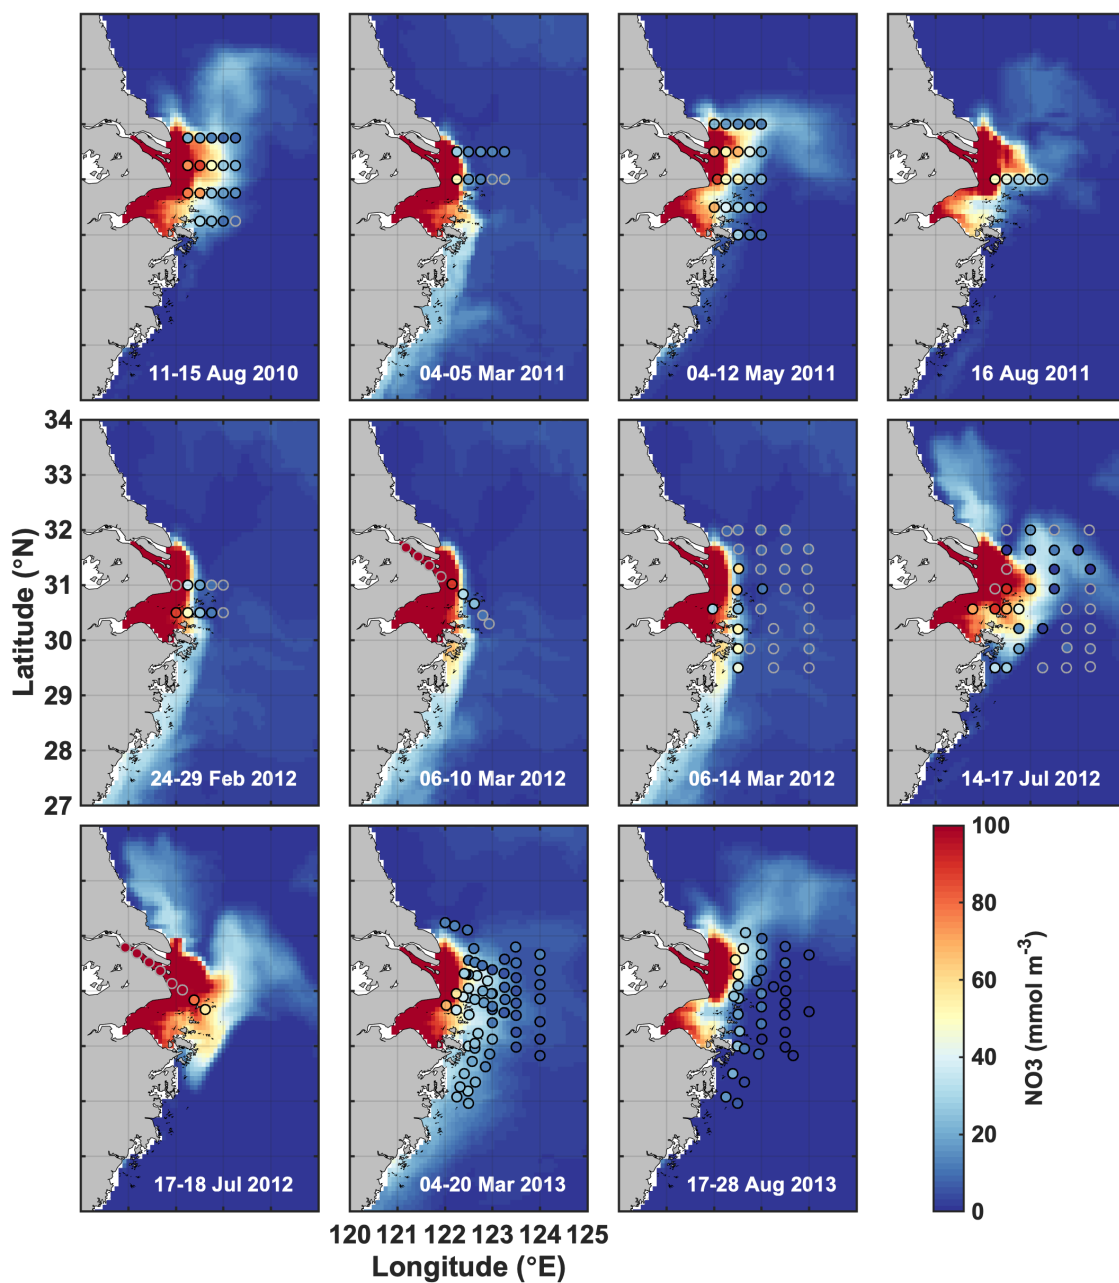

**Figure S1.** Comparison of simulated surface  $\text{NO}_3$  (colored maps) with the 2010-2012 observations of Gao et al. (2015) and the 2013 observations of Ge et al. (2020) (2013) for the dates indicated in each panel (colored dots). Simulated  $\text{NO}_3$  corresponds to the average conditions during the cruise.

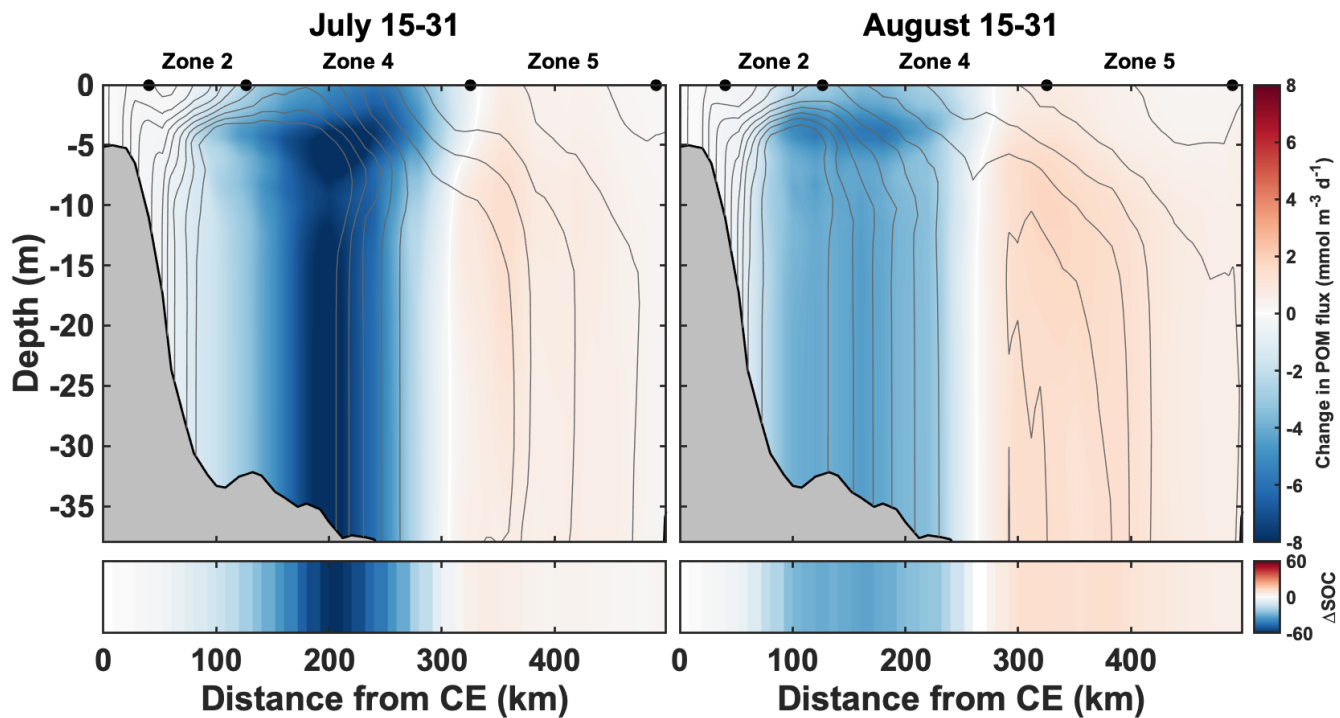

**Figure S2.** Mean change in POM flux and SOC due to P limitation (baseline – NoPlim) along the CE-JI transect line (see Figure 1) for July 15-31 (left) and August 15-31 (right).

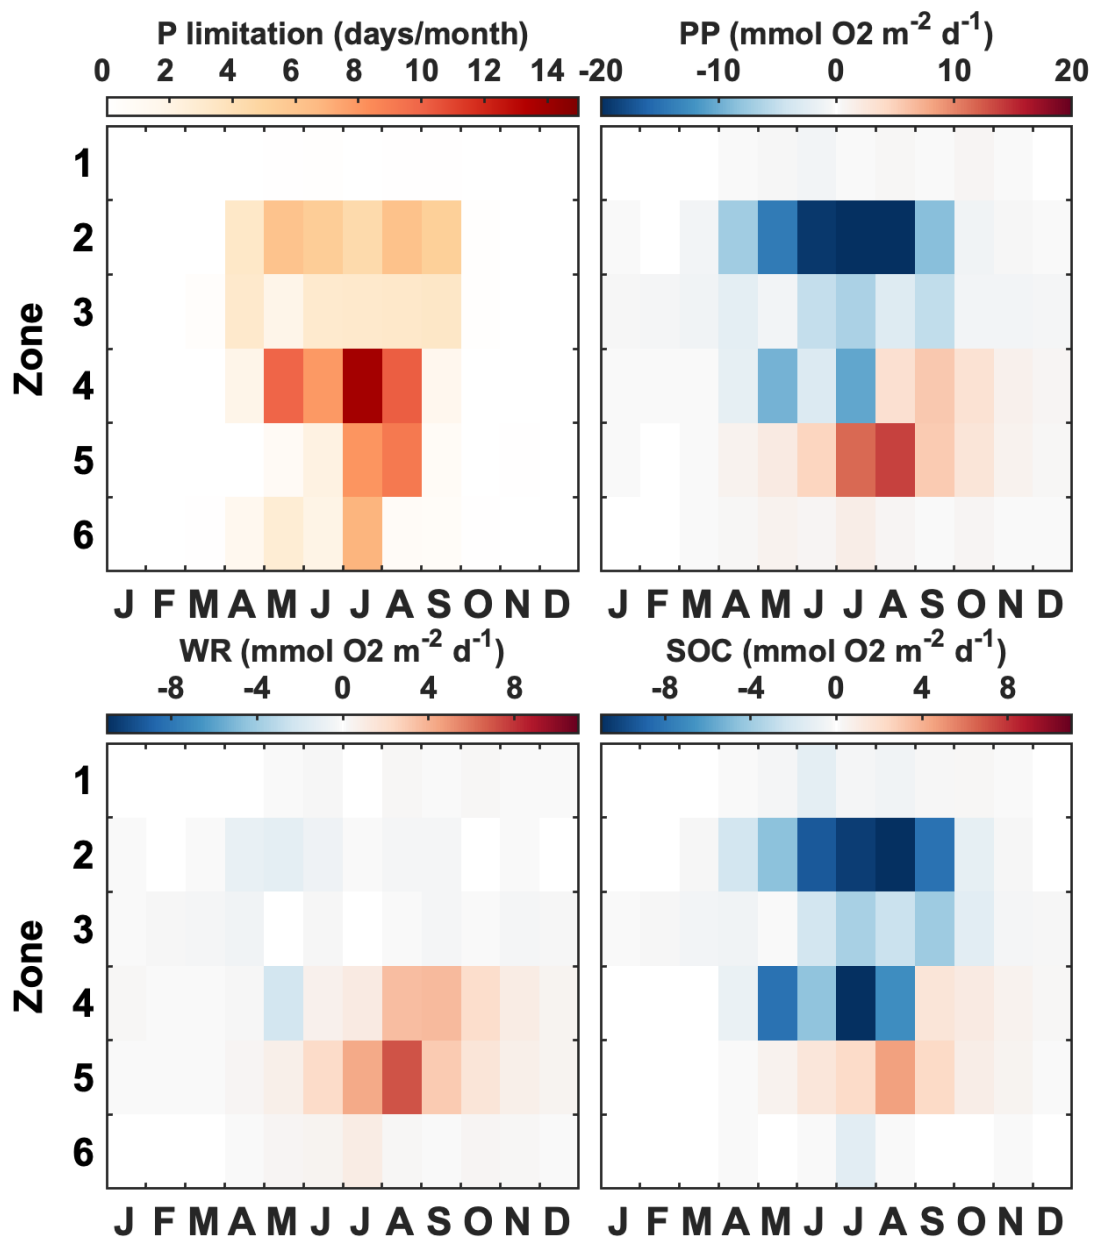

**Figure S3.** Duration of P limitation in the surface waters of zones 1-6 (upper left) and change in primary production (upper right) water column respiration (lower left) and sediment O<sub>2</sub> consumption (lower right). Data are averages for 2008-2013.

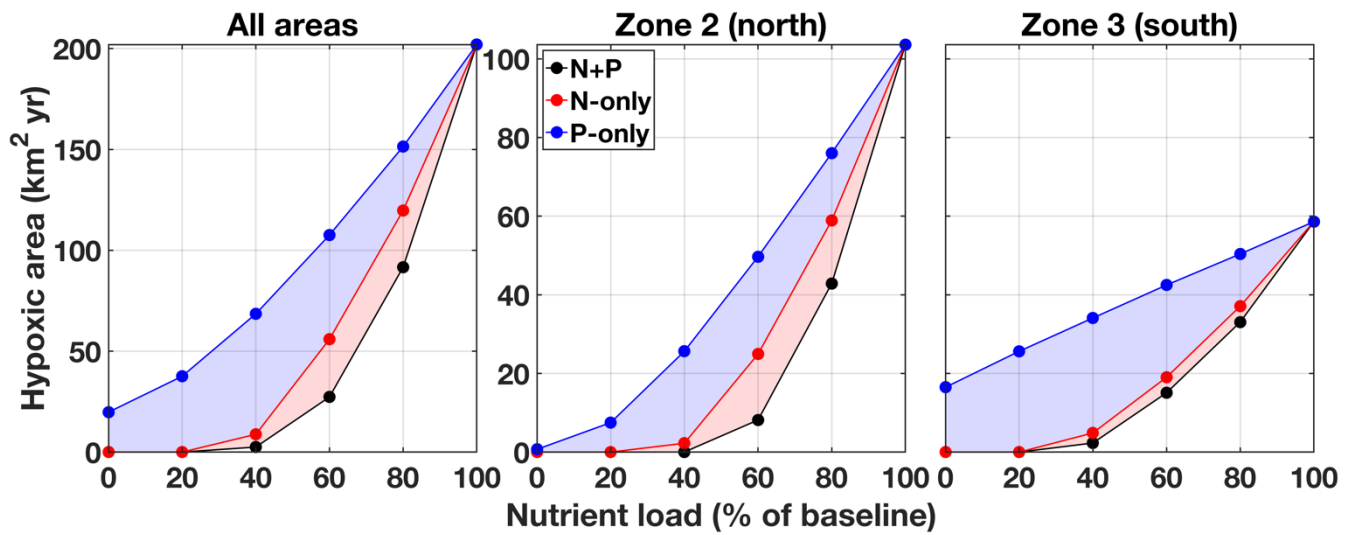

**Figure S4.** Effect of nutrient reduction on the size of the hypoxic area (time integrated) for zones 1-6 combined (left), zone 2 (middle) and zone 3 (right). The results presented are an average for 2011-2013.

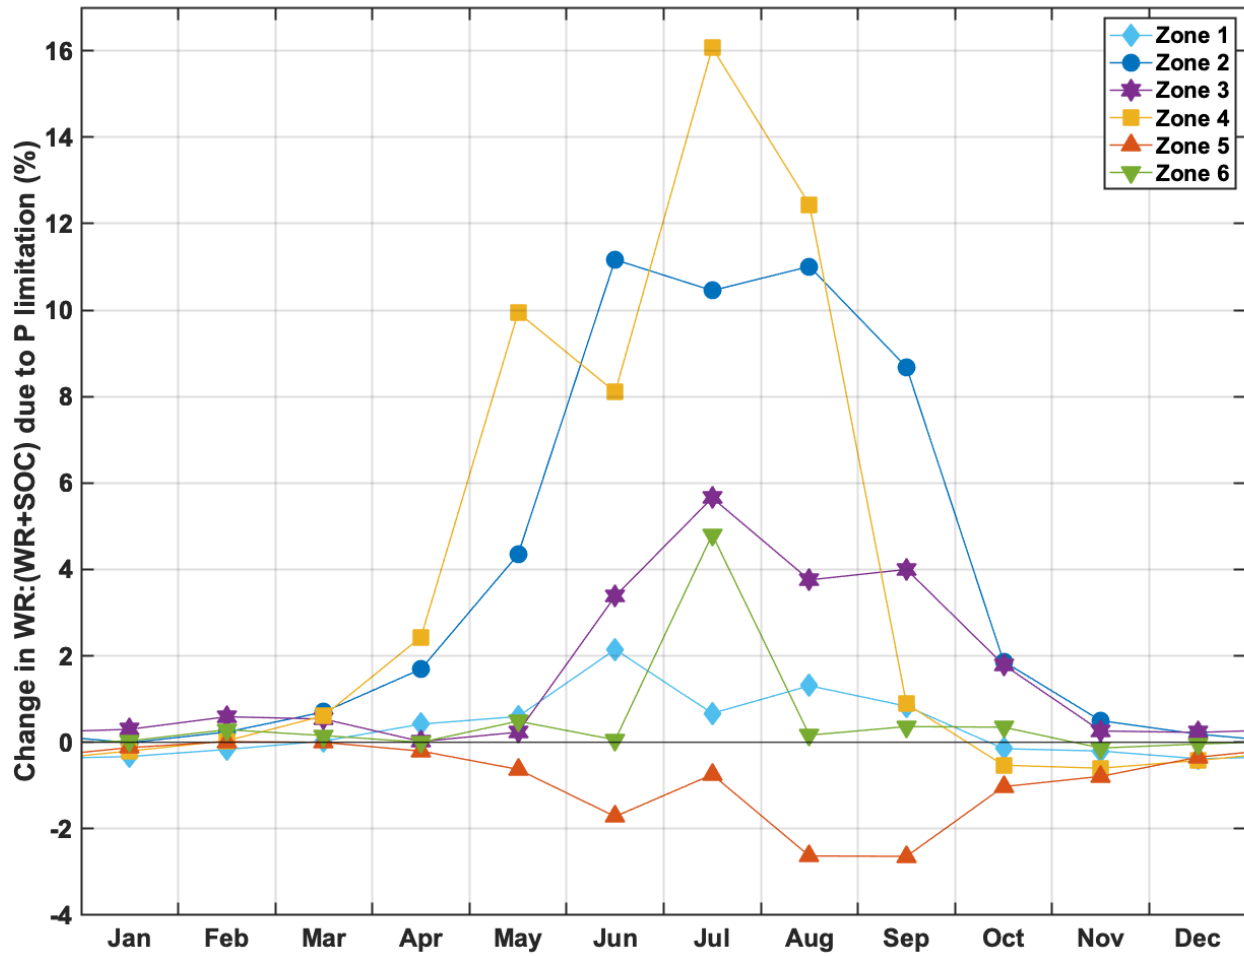

**Figure S5.** Change in the relative importance of water column versus total respiration (2008-2013 monthly mean) due to P limitation (baseline - NoPlim).

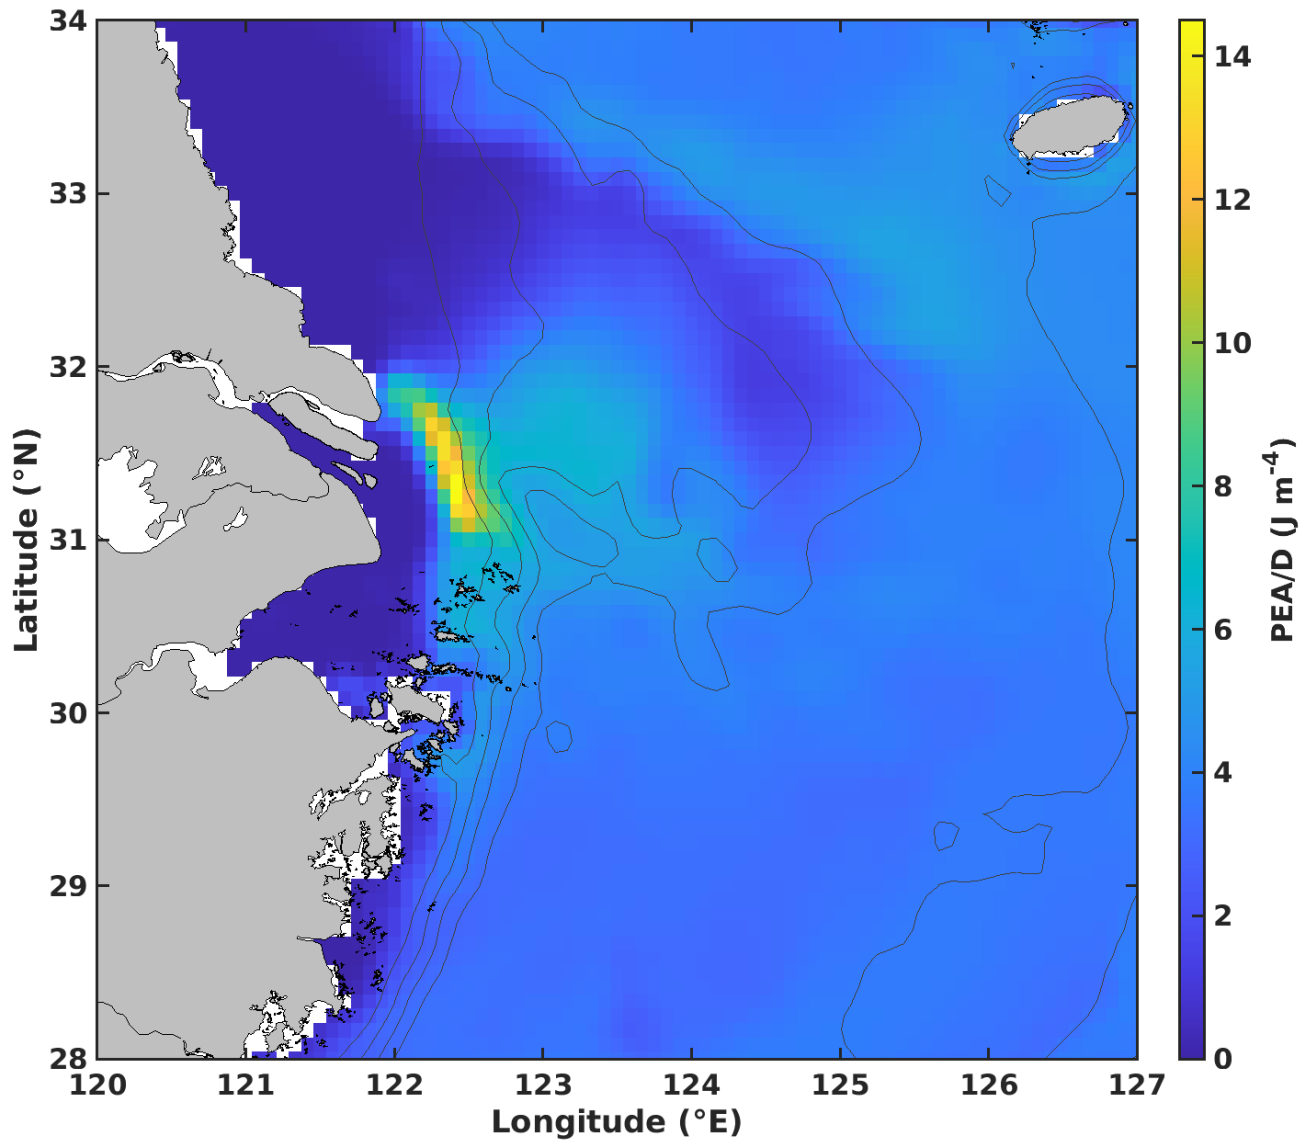

**Figure S6.** Spatial distribution of stratification in summer (July-August, 2008-2013 averaged) in the ECS. The Potential Energy Anomaly (a proxy for stratification) is divided by water column depth to enable the comparison of areas with various depths (see Große et al. (2020) for details).
